# Supplementary material for: Differential placental expression profile of human Growth Hormone/Chorionic Somatomammotropin genes in pregnancies with pre-eclampsia and gestational diabetes mellitus
Source: PubMed Central journal article supplement (PMC3325480; doi:10.1016/j.mce.2012.02.009), 2012-05-15

# Supplemental figure 1.

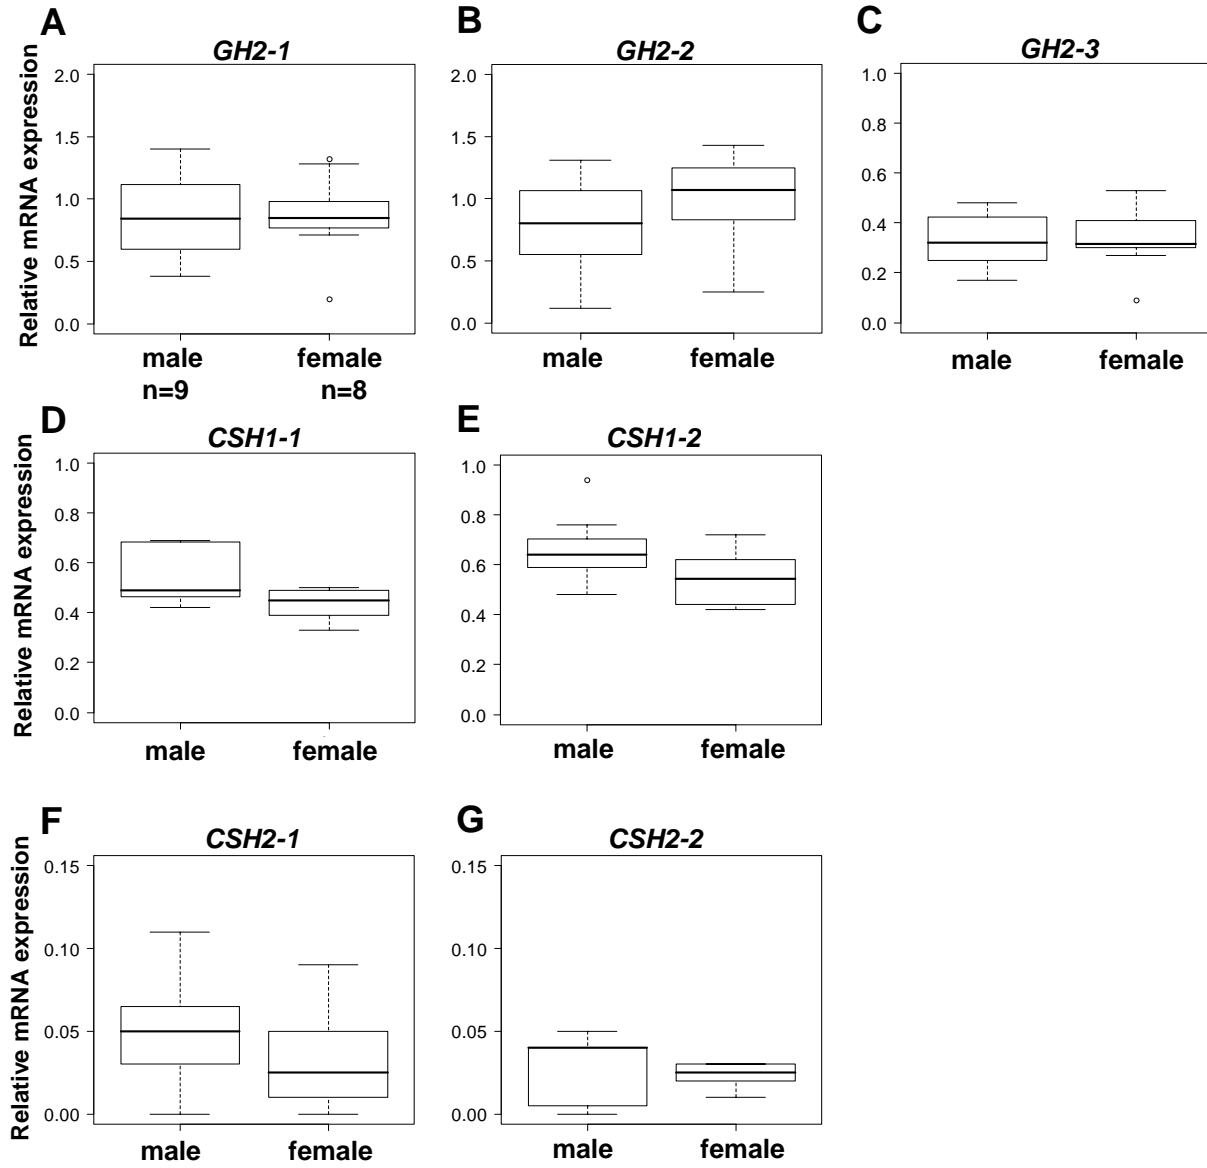

# Supplemental figure 2.

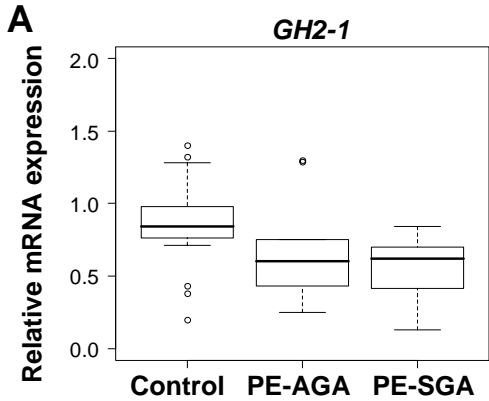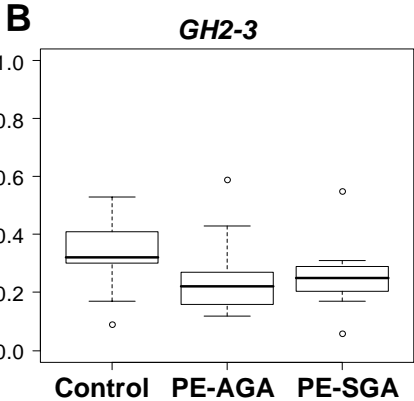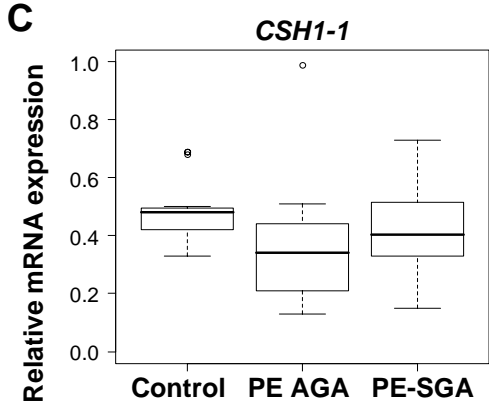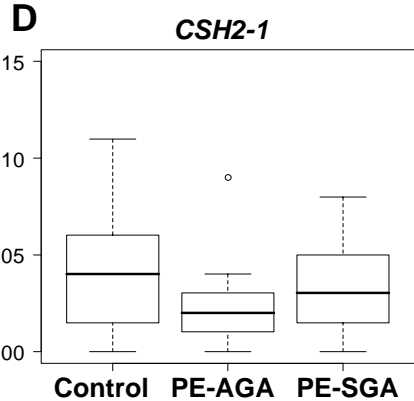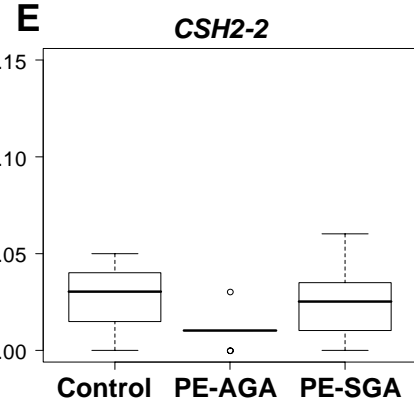

Supplement: mmc1.pdf [file mmc1.pdf]
